# Supplementary material
Source: PubMed Central journal article supplement (PMC7159092)

# Supporting Figure S1

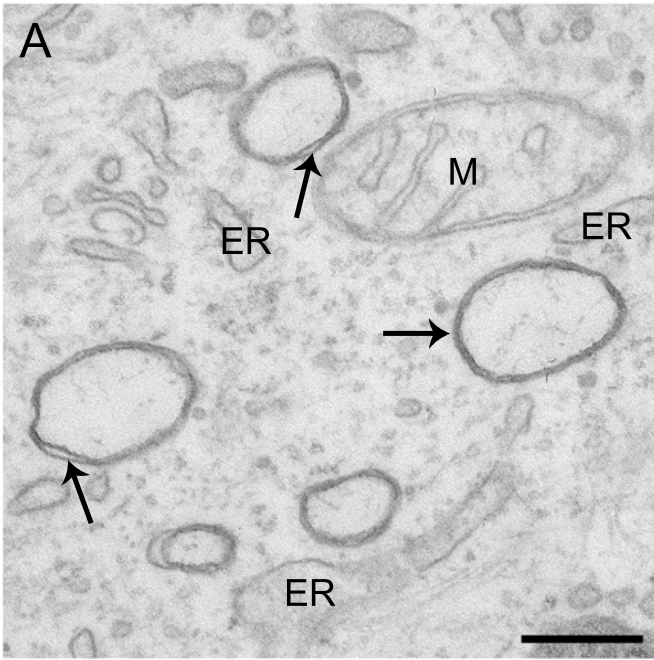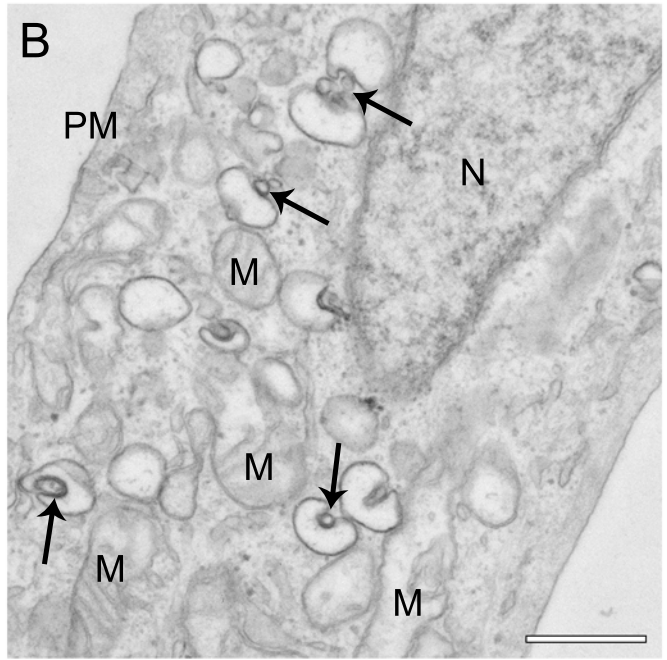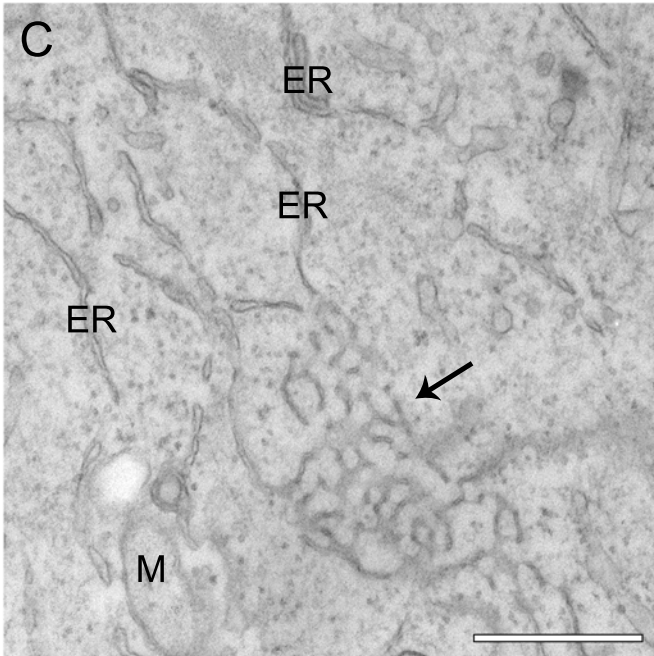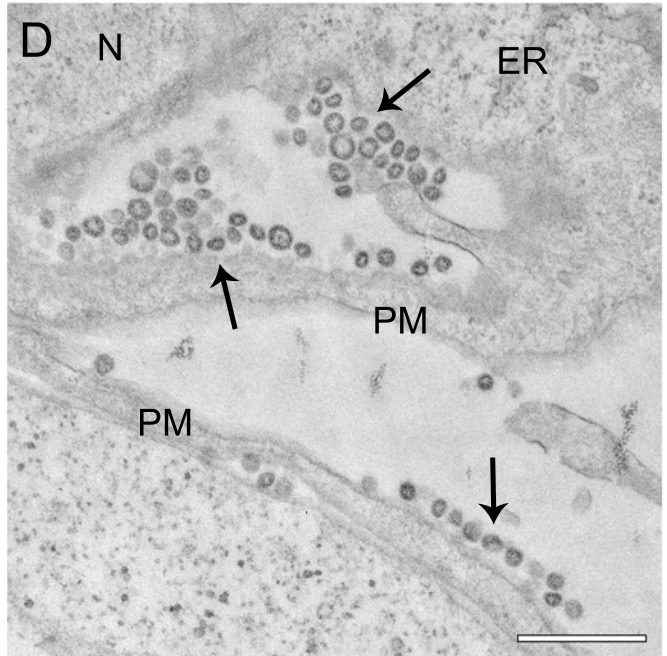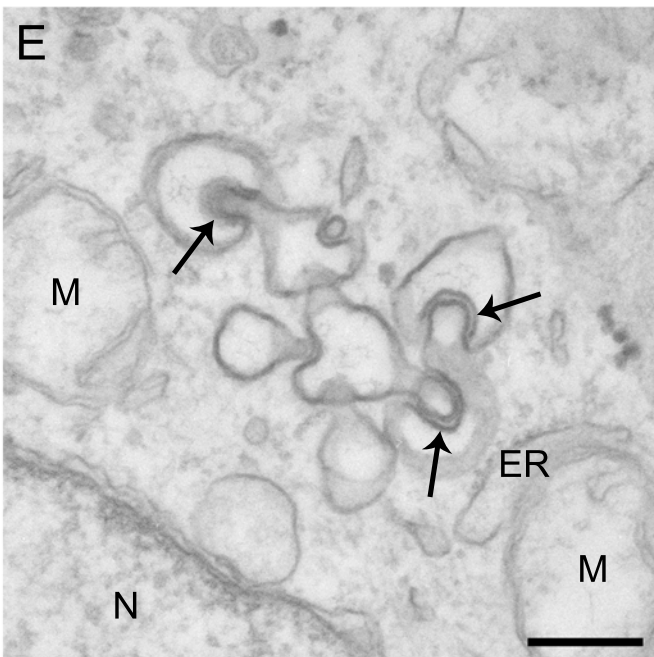

Supplement: CMI-12-844-s002.pdf [file CMI-12-844-s002.pdf]

# Supporting Figure S2

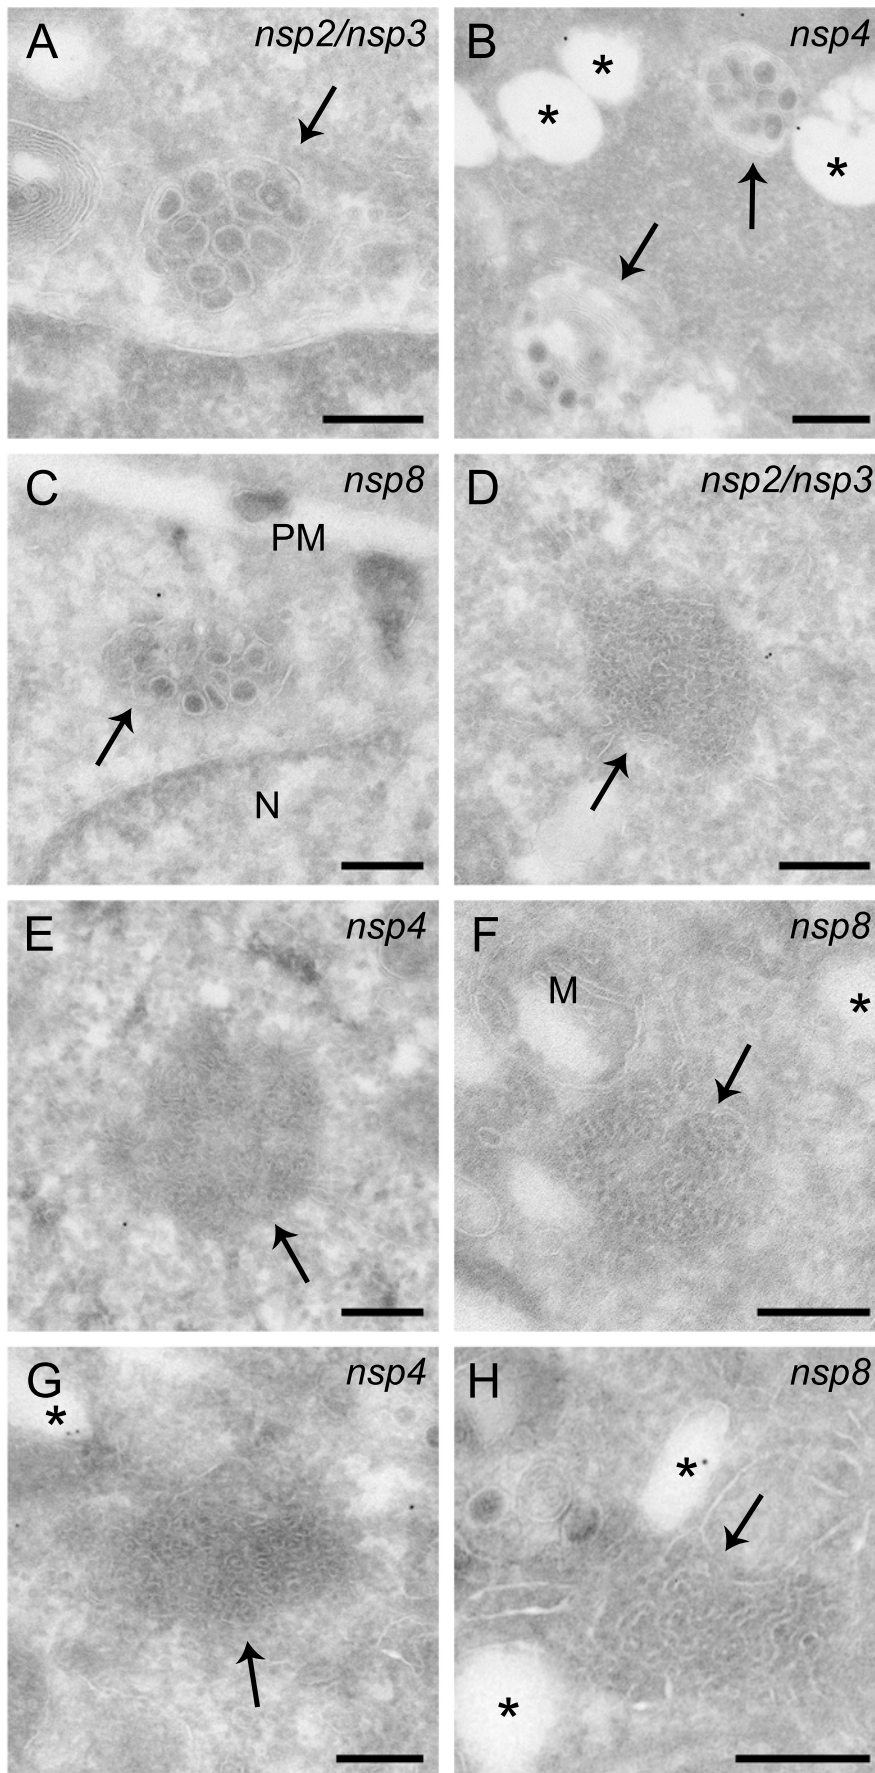

Supplement: CMI-12-844-s003.pdf [file CMI-12-844-s003.pdf]

Supporting Figure S3

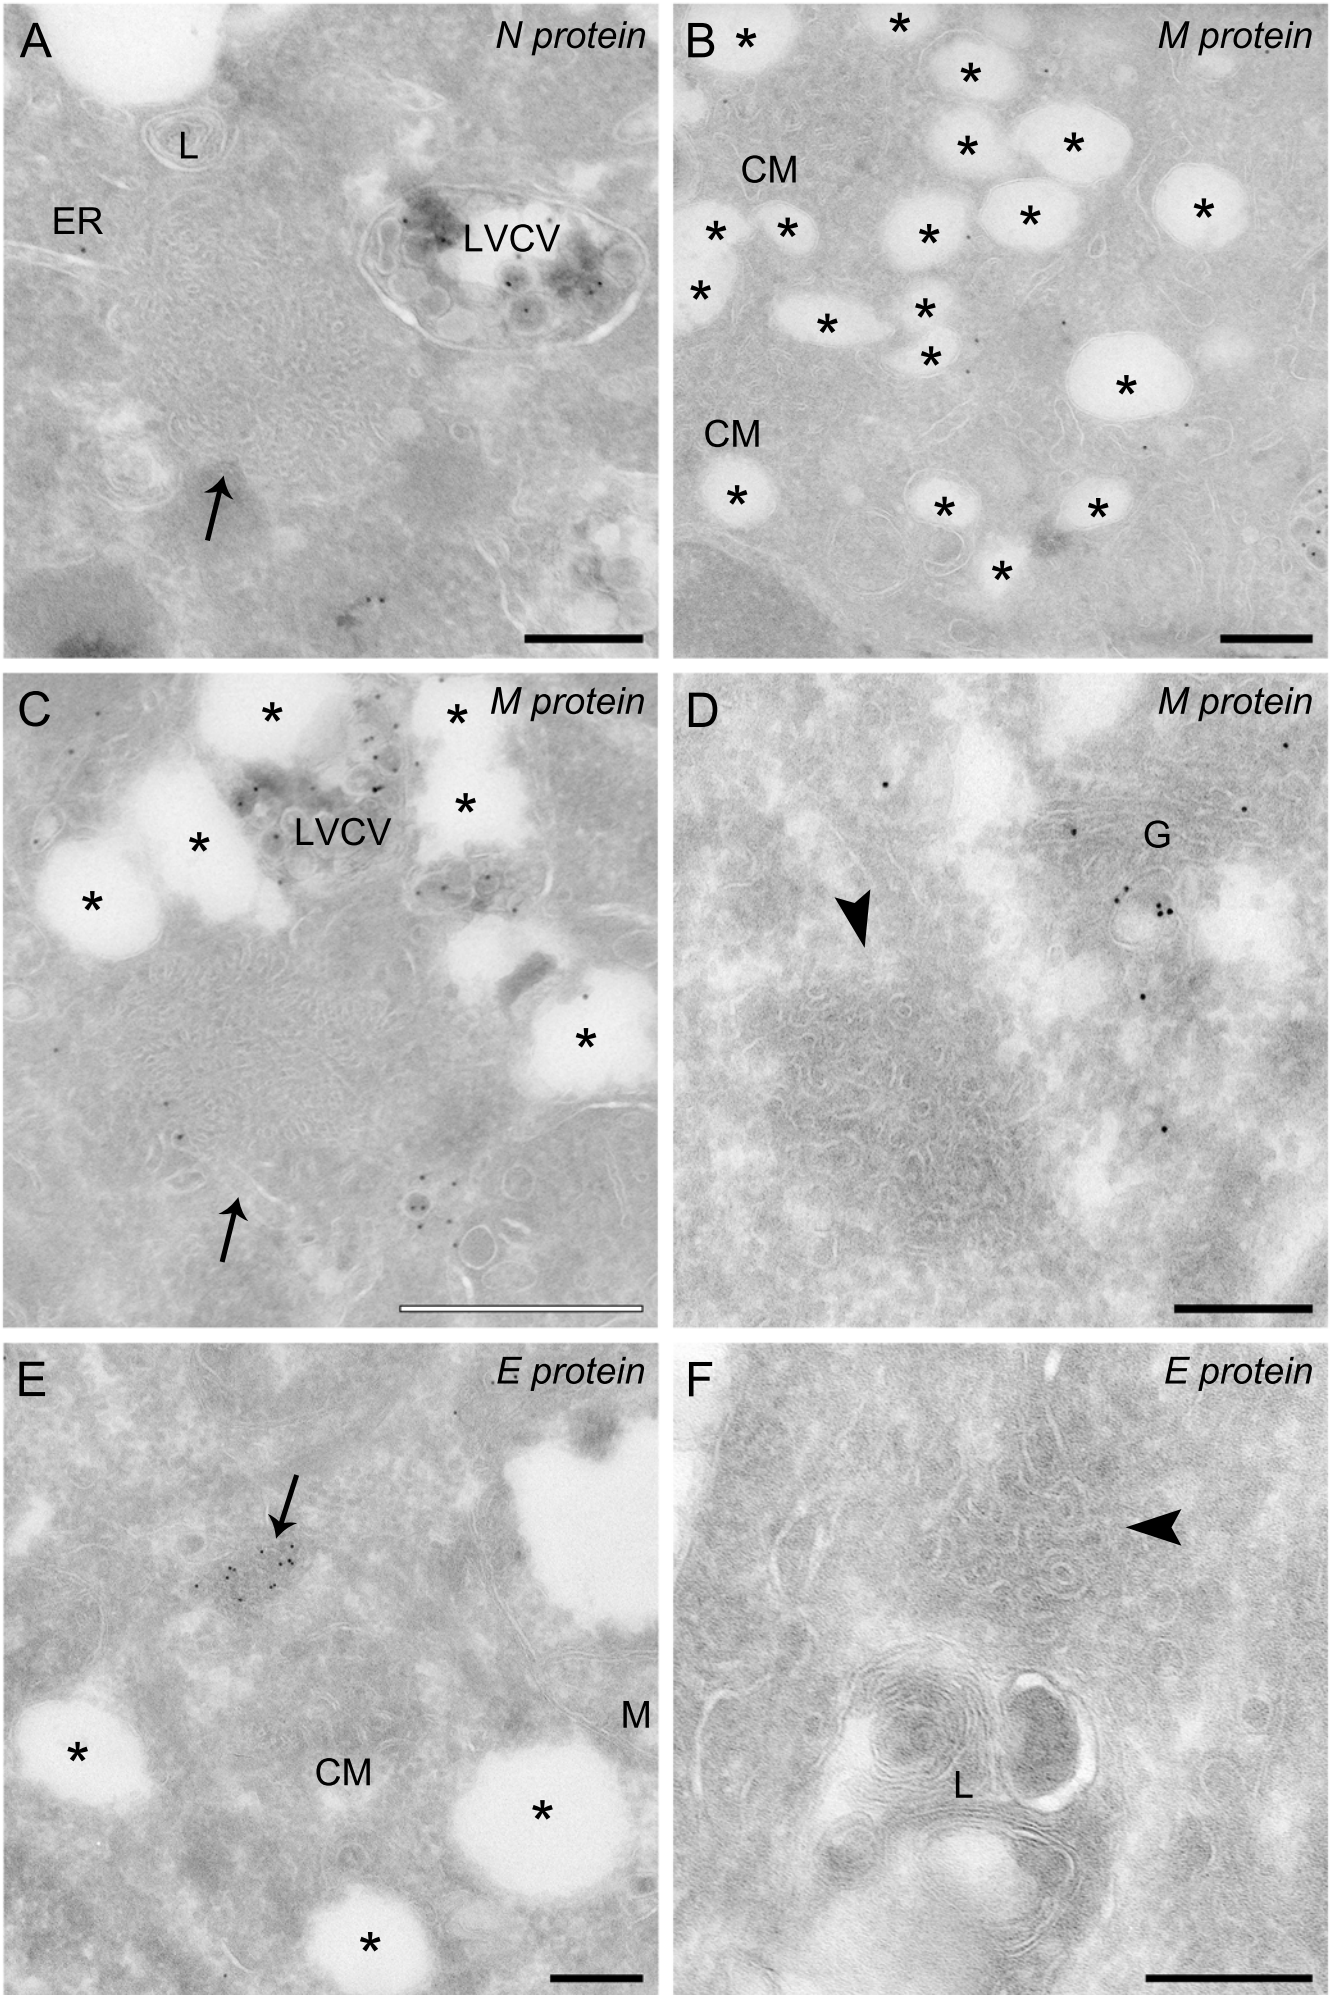

Supplement: CMI-12-844-s004.pdf [file CMI-12-844-s004.pdf]

Supporting Figure S4

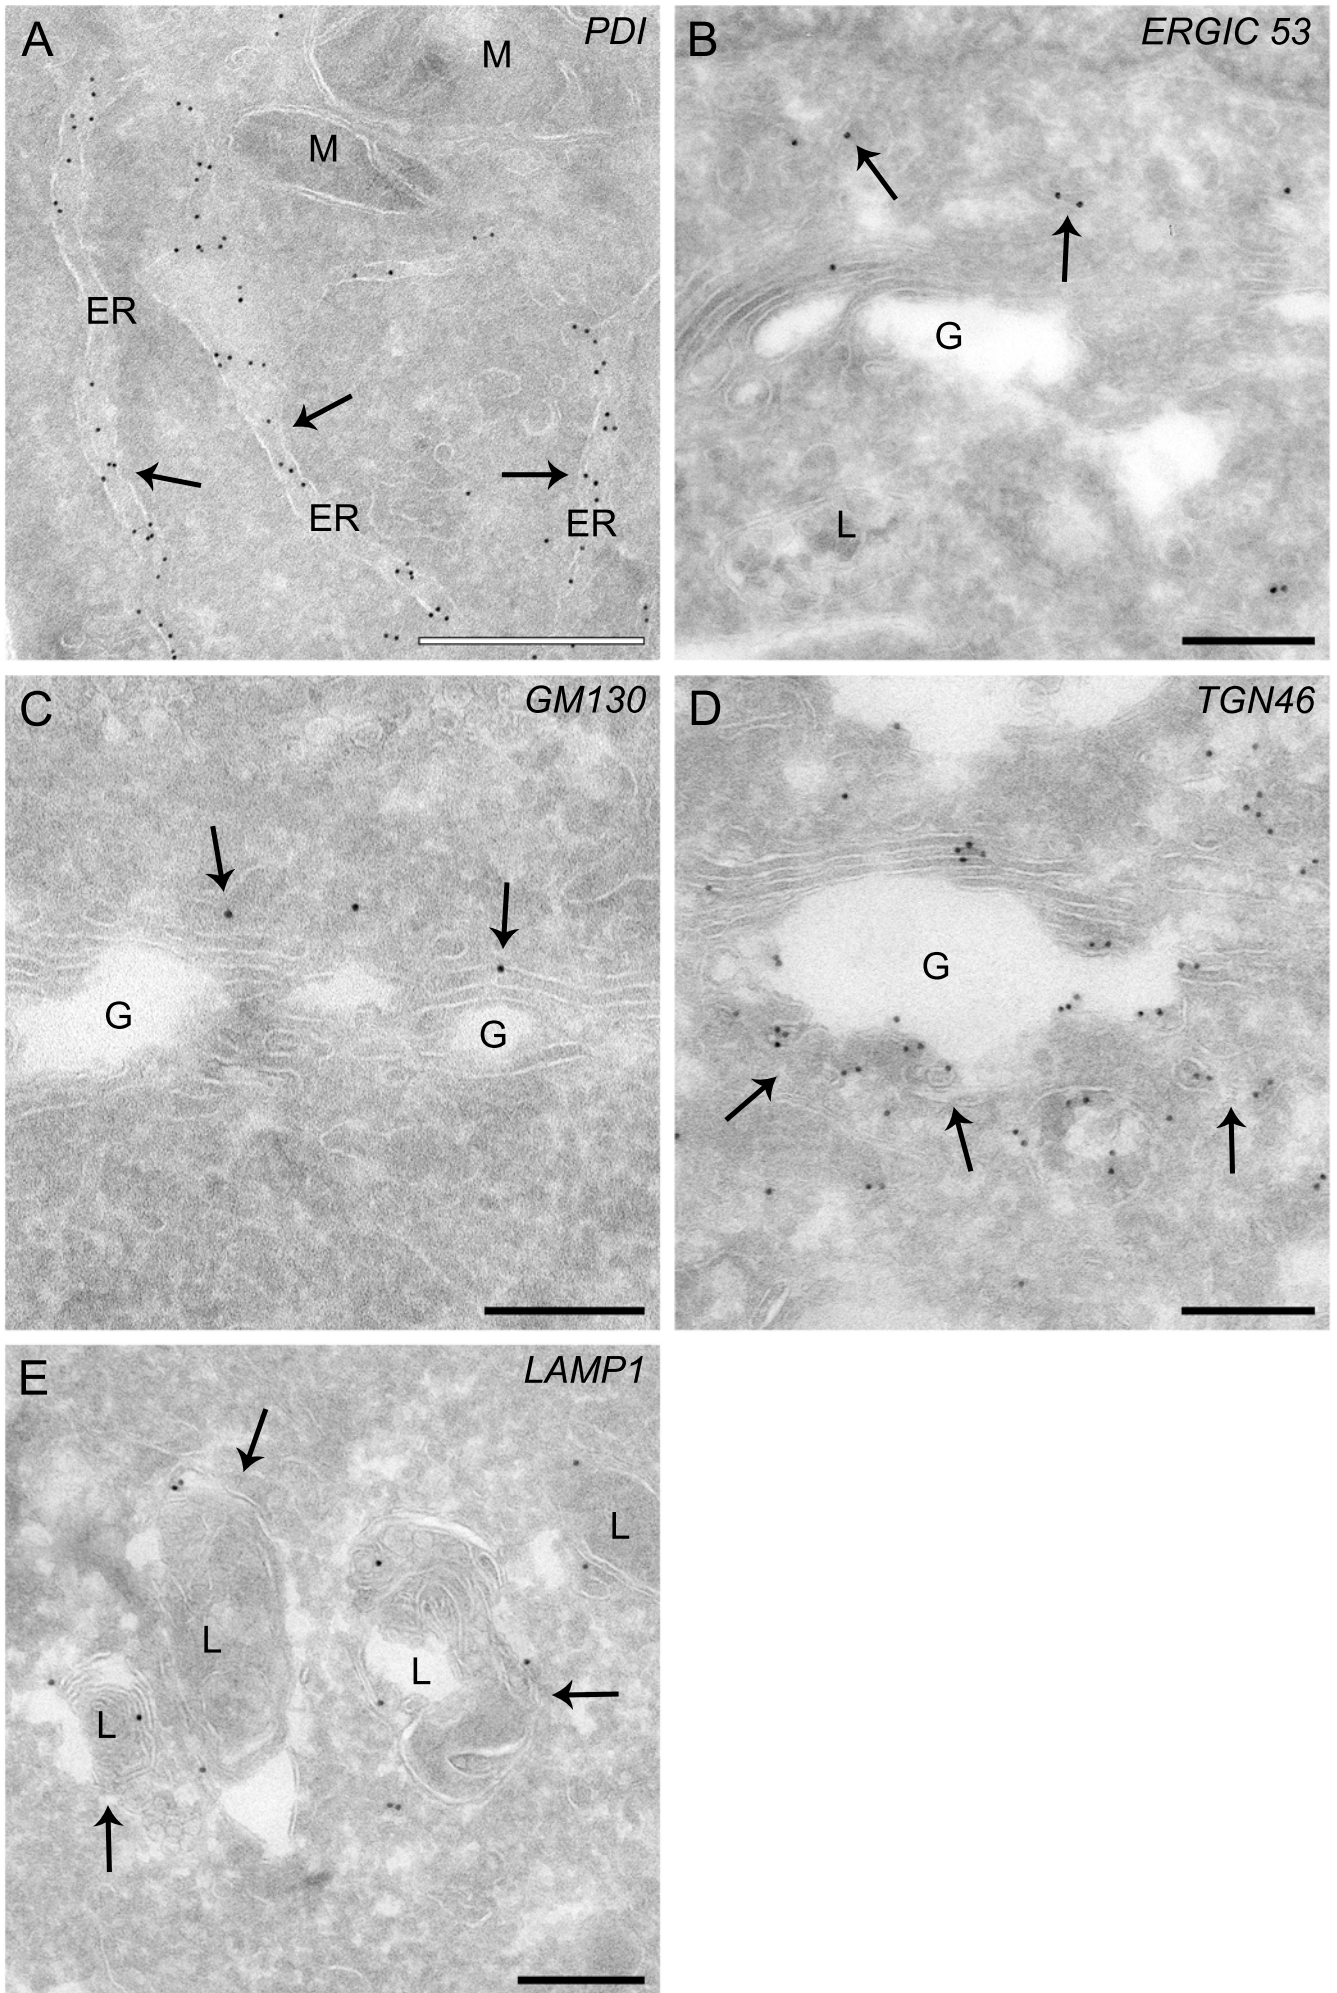

Supplement: CMI-12-844-s005.pdf [file CMI-12-844-s005.pdf]

# Supporting Figure S5

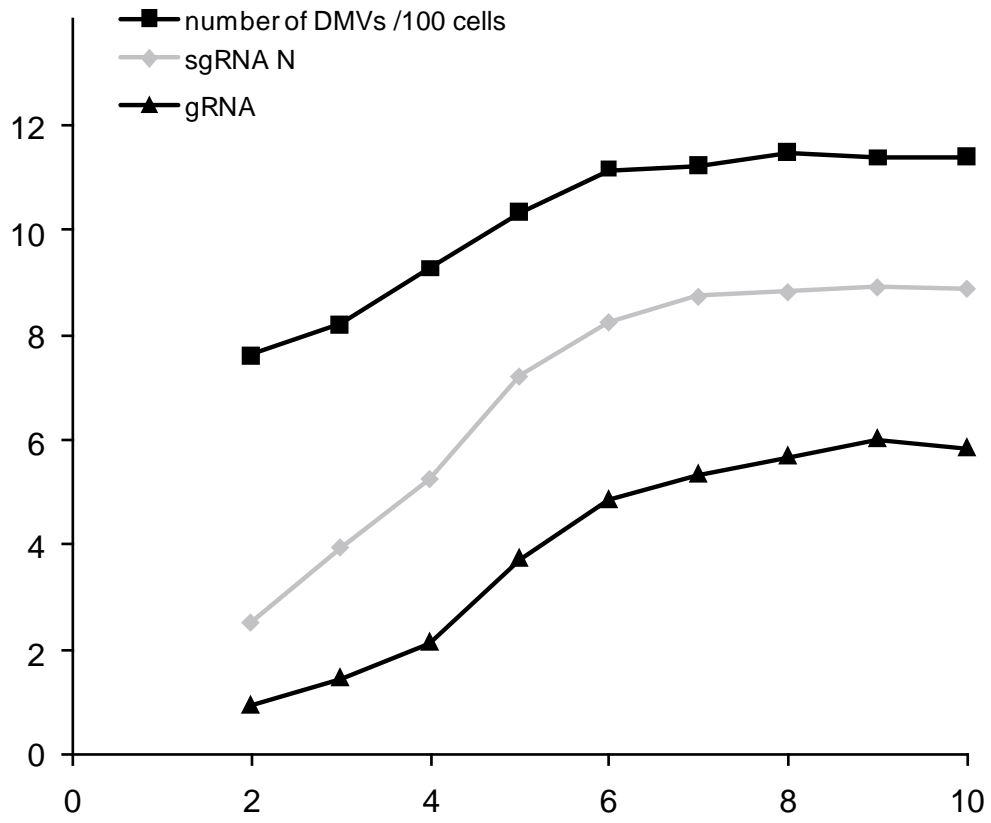

Supplement: CMI-12-844-s006.pdf [file CMI-12-844-s006.pdf]

Supporting Figure S6

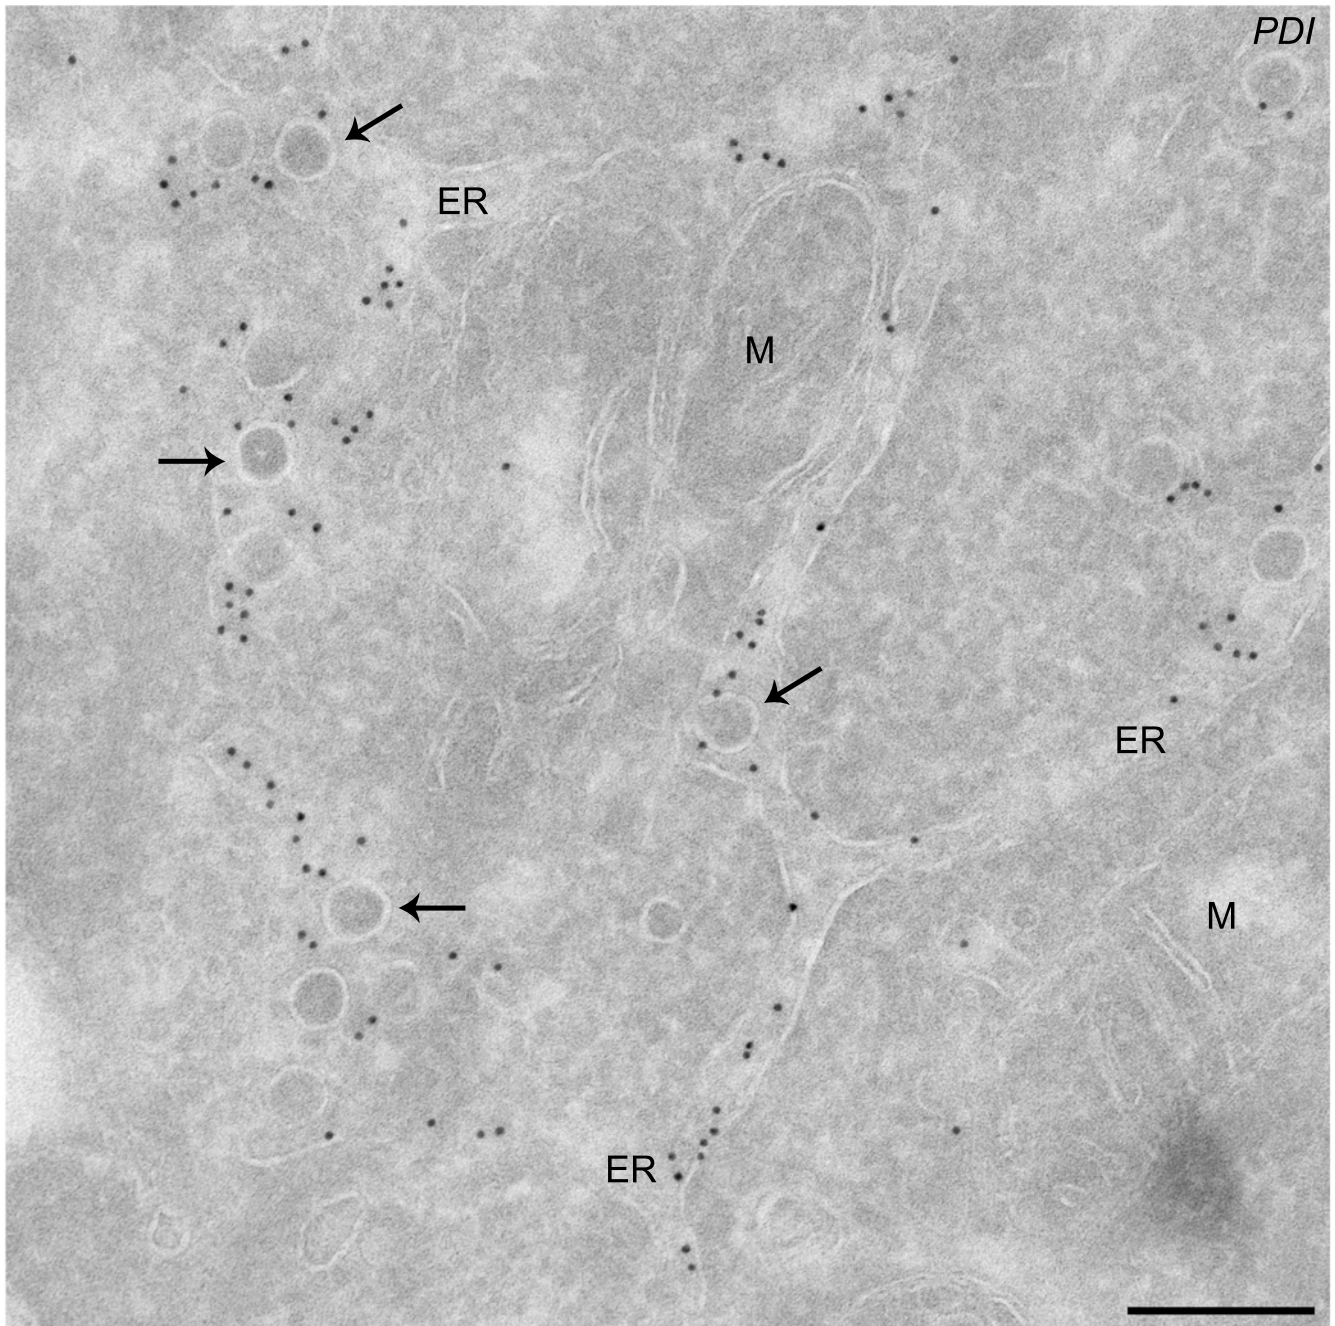

Supplement: CMI-12-844-s007.pdf [file CMI-12-844-s007.pdf]
